# Supplementary material for: Construction of a double heterojunction between graphite carbon nitride and anatase TiO2 with co-exposed (101) and (001) faces for enhanced photocatalytic degradation
Source: Royal Society of Chemistry journal article supplement (doi:10.1039/d2ra01620f), 2022-01-01
Supplement: d2ra01620f1.pdf [file d2ra01620f1.pdf]

## Supplementary Information

### **Construction of a Double Heterojunction between Graphite Carbon Nitride and Anatase TiO<sub>2</sub> with Co-exposed (101) and (001) Faces for Enhanced Photocatalytic Degradation**

Jingjing Sun<sup>a, ‡</sup>, Lang Deng<sup>a, ‡</sup>, Jing Sun<sup>a,\*</sup>, Tingting Shen<sup>a,\*</sup>, Xikui Wang<sup>b,\*</sup>,  
Rusong Zhao<sup>c</sup>, Yiyao Zhang<sup>a</sup>, Baolin Wang<sup>a</sup>

<sup>a</sup> School of Environmental Science and Engineering, Qilu University of Technology (Shandong Academy of Sciences), Jinan 250353, PR China

<sup>b</sup> College of Environmental Science and Engineering, Shandong Agriculture and Engineering University, Jinan 251100, PR China

<sup>c</sup> Key Laboratory for Applied Technology of Sophisticated Analytical Instrument of Shandong Province, Shandong Analysis and Test Center, Qilu University of Technology (Shandong Academy of Science), Jinan 250014, PR China

\* Corresponding author.

E-mail address: [sunjing77@qlu.edu.cn](mailto:sunjing77@qlu.edu.cn) (J. Sun);

[shentingting@qlu.edu.cn](mailto:shentingting@qlu.edu.cn) (T. Shen);

‡These authors contributed equally to the work.

(8 Pages, 9 Figures, 5 Table)

---

### 1. Preparation of g-C<sub>3</sub>N<sub>4</sub>/P25

1.15 g of g-C<sub>3</sub>N<sub>4</sub> powder and 0.575 g P25 were added in a porcelain crucible containing 30 mL of ethyl alcohol and stirred until completely dry in the water bath at 80°C. And then move the crucible to a muffle furnace. At the heating rate of 3°C/min, the temperature was raised to 300°C and kept for 2 h. Finally, the g-C<sub>3</sub>N<sub>4</sub>/P25 powder was obtained.

2. The forbidden band width of synthesized photocatalysts were calculated by Tauc equation (1):

$$\alpha hv = A(hv - E_g)^n \quad (1)$$

Where  $\alpha$ ,  $hv$ ,  $E_g$ , and  $A$  represent the absorption coefficient, incident photo energy, band gap energy, and absorption constant, respectively. Here,  $n = 2$  due to anatase TiO<sub>2</sub> are indirect semiconductor materials.

3. The percentage of {001} and {101} facets can be calculated by equation (2-4):

$$S_{001} = 2a^2 \quad (2)$$

$$S_{001}\% = \frac{\cos \theta}{\cos \theta + \left(\frac{a}{b}\right)^{-2} - 1} \quad (3)$$

$$S_{101}\% = 1 - S_{001}\% \quad (4)$$

Here  $\theta$  is the theoretical value (68.3°) for the angle between the {001} and {101} facets of anatase. As indicated in the slab model, two independent parameters  $b$  and  $a$  denote lengths of the side of the bipyramid and the side of the square {001} ‘truncation’ facets, respectively.

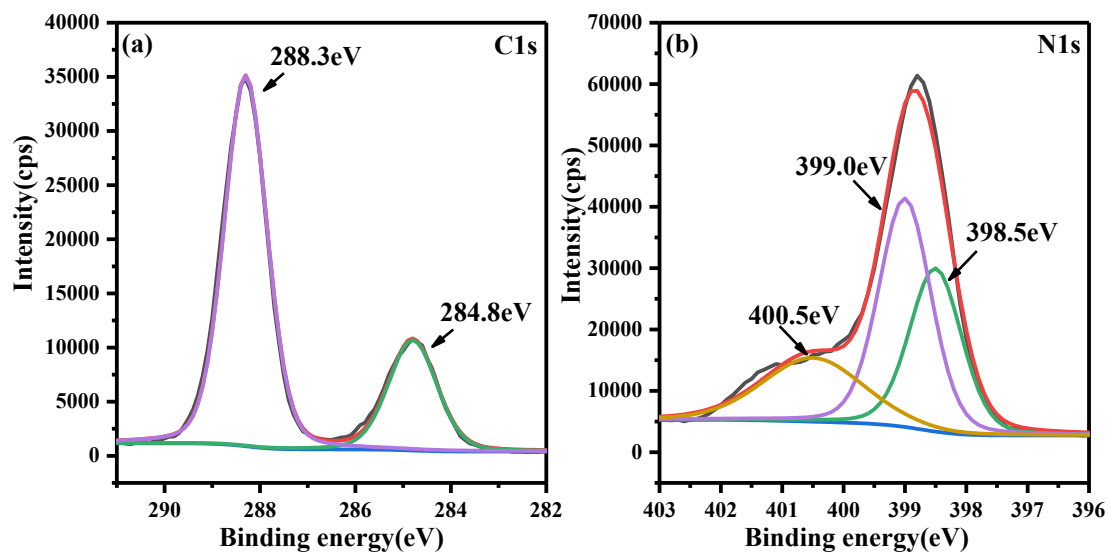

Figure S1. XPS spectra of pure  $g\text{-C}_3\text{N}_4$ : C 1s spectra (a) and N 1s spectra (b).

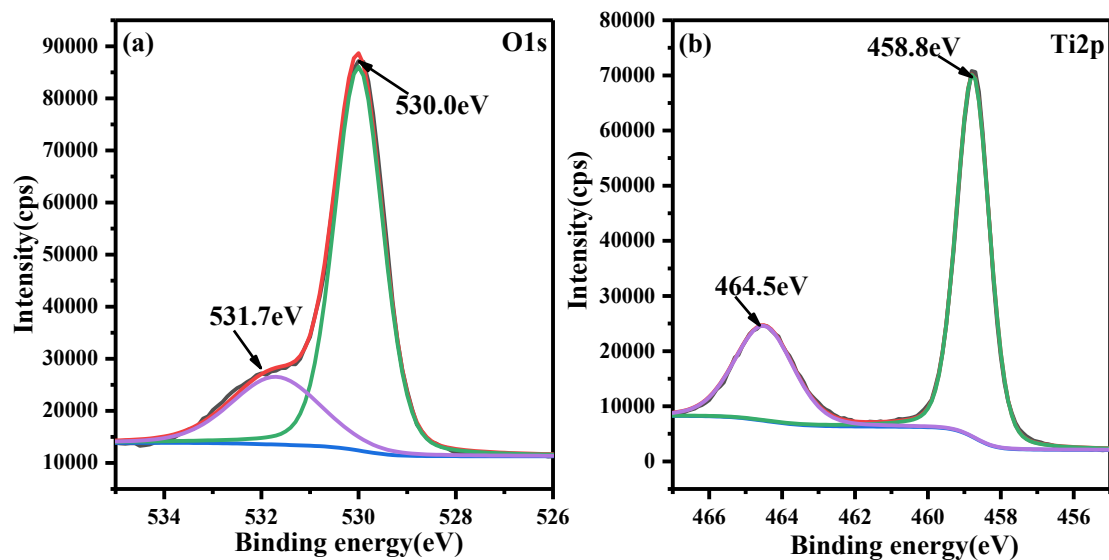

Figure S2. XPS spectra of pure (101)-(001)- $\text{TiO}_2$ : O 1s spectra (a) and Ti 2p spectra (b).

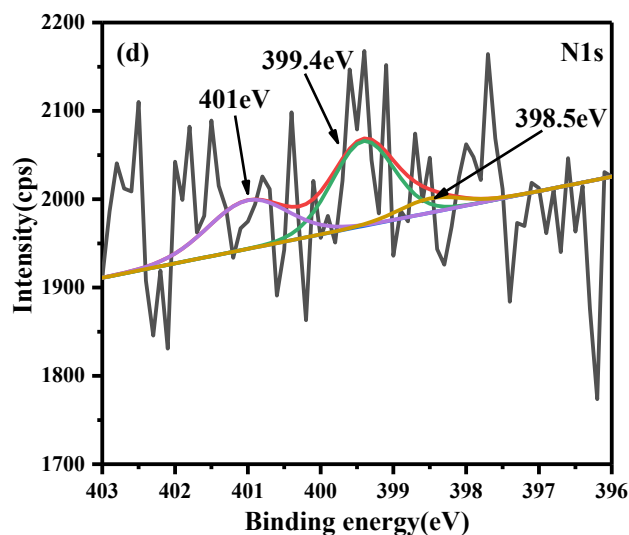

Figure S3. N 1s spectra of g-C<sub>3</sub>N<sub>4</sub>/(101)-(001)-TiO<sub>2</sub>

**Table S1.** g-C<sub>3</sub>N<sub>4</sub>; g-C<sub>3</sub>N<sub>4</sub>/(101)-(001)-TiO<sub>2</sub> samples for details of C 1s peak fitting.

| Sample     | C 1s, g-C <sub>3</sub> N <sub>4</sub> |   | C 1s, g-C <sub>3</sub> N <sub>4</sub> /(101)-(001)-TiO <sub>2</sub> |          |          |          |
|------------|---------------------------------------|---|---------------------------------------------------------------------|----------|----------|----------|
| Boundary:  | High BE=291.0 eV;                     |   | High BE=290.2 eV;                                                   |          |          |          |
| Fitting    | Low BE=280.6 eV; Slope=0;             |   | Low BE=282 eV; Slope=0;                                             |          |          |          |
| conditions | $\sum x^2 = 18.89$                    |   | $\sum x^2 = 2.19$                                                   |          |          |          |
| B.E. (eV)  | 284.8 eV                              | / | 288.3 eV                                                            | 284.7 eV | 286.2 eV | 288.6 eV |
|            | C-C/C=C                               |   | N-C=N                                                               | C-C/C=C  | C-OH     | N-C=N    |

**Table S2.** g-C<sub>3</sub>N<sub>4</sub>;g-C<sub>3</sub>N<sub>4</sub>/(101)-(001)-TiO<sub>2</sub> samples for details of N 1s peak fitting.

| Sample     | N 1s, g-C <sub>3</sub> N <sub>4</sub> |                  |                 | N1s, g-C <sub>3</sub> N <sub>4</sub> /(101)-(001)-TiO <sub>2</sub> |                  |                 |
|------------|---------------------------------------|------------------|-----------------|--------------------------------------------------------------------|------------------|-----------------|
| Boundary:  | High BE=403 eV;                       |                  |                 | High BE=403 eV;                                                    |                  |                 |
| Fitting    | Low BE=394 eV; Slope=0;               |                  |                 | Low BE=394 eV; Slope=0;                                            |                  |                 |
| conditions | $\sum x^2 = 9.12$                     |                  |                 | $\sum x^2 = 2.34$                                                  |                  |                 |
| B.E. (eV)  | 398.5 eV                              | 399.0 eV         | 400.5 eV        | 398.5 eV                                                           | 399.4 eV         | 401.0 eV        |
|            | C-N=C                                 | N-C <sub>3</sub> | NH <sub>x</sub> | C-N=C                                                              | N-C <sub>3</sub> | NH <sub>x</sub> |

**Table S3.** (101)-(001)-TiO<sub>2</sub>; g-C<sub>3</sub>N<sub>4</sub>/(101)-(001)-TiO<sub>2</sub> samples for details of O 1s peak fitting.

| Sample             | O1s, (101)-(001)-TiO <sub>2</sub>                                            |                              | O1s, g-C <sub>3</sub> N <sub>4</sub> /(101)-(001)-TiO <sub>2</sub>          |                              |
|--------------------|------------------------------------------------------------------------------|------------------------------|-----------------------------------------------------------------------------|------------------------------|
| Fitting conditions | Boundary: High BE=535 eV;<br>Low BE=525.6 eV; Slope=0;<br>$\sum x^2 = 10.14$ |                              | Boundary: High BE=535 eV;<br>Low BE=525.7 eV; Slope=0;<br>$\sum x^2 = 7.48$ |                              |
| B.E. (eV)          | 530.0 eV<br>(N) <sub>2</sub> C-OH                                            | 531.7 eV<br>H <sub>2</sub> O | 529.9 eV<br>(N) <sub>2</sub> C-OH                                           | 531.7 eV<br>H <sub>2</sub> O |

**Table S4.** (101)-(001)-TiO<sub>2</sub>; g-C<sub>3</sub>N<sub>4</sub>/(101)-(001)-TiO<sub>2</sub> samples for details of Ti 2p peak fitting.

| Sample             | Ti 2p, g-C <sub>3</sub> N <sub>4</sub>                                    |                                  | Ti 2p, g-C <sub>3</sub> N <sub>4</sub> /(101)-(001)-TiO <sub>2</sub>      |                                  |
|--------------------|---------------------------------------------------------------------------|----------------------------------|---------------------------------------------------------------------------|----------------------------------|
| Fitting conditions | Boundary: High BE=467 eV;<br>Low BE=455 eV; Slope=0;<br>$\sum x^2 = 8.20$ |                                  | Boundary: High BE=467 eV;<br>Low BE=455 eV; Slope=2;<br>$\sum x^2 = 11.9$ |                                  |
| B.E. (eV)          | 458.8 eV<br>Ti 2p <sub>3/2</sub>                                          | 464.5 eV<br>Ti 2p <sub>1/2</sub> | 458.7 eV<br>Ti 2p <sub>3/2</sub>                                          | 464.4 eV<br>Ti 2p <sub>1/2</sub> |

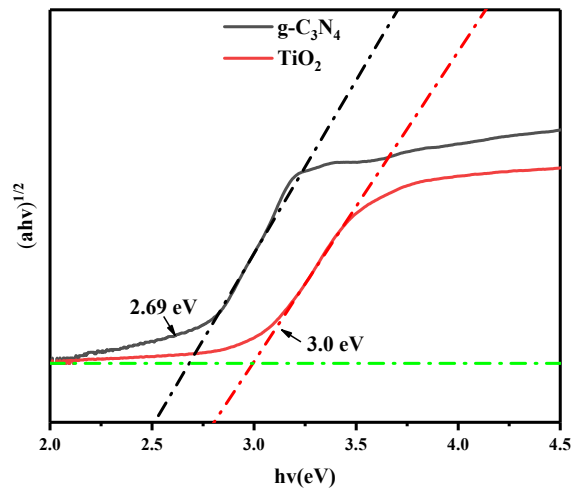

Figure S4. Band gap width diagram of g-C<sub>3</sub>N<sub>4</sub> and (101)-(001)-TiO<sub>2</sub>

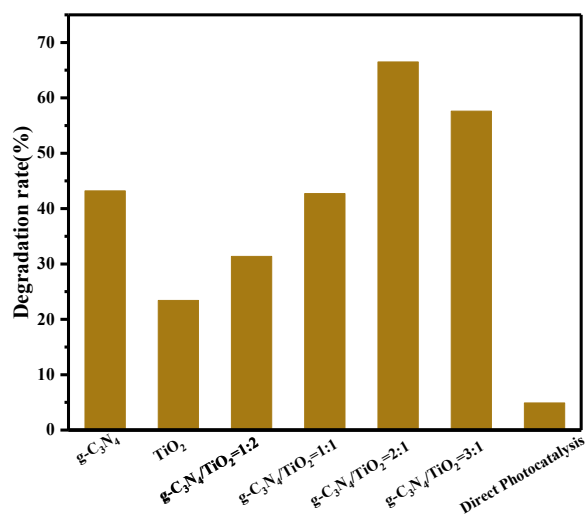

Figure S5. Paracetamol degradation rates of the as-prepared samples.

Table S5. Kinetic analysis of degradation of Paracetamol by the as-prepared samples.

| Sample                                                  | The pseudo-first-order reaction kinetics | k (h <sup>-1</sup> ) | R <sup>2</sup> |
|---------------------------------------------------------|------------------------------------------|----------------------|----------------|
| g-C <sub>3</sub> N <sub>4</sub>                         | $\ln (C_t/C_0) = -0.09272 - 0.08761x$    | 0.1031               | 0.9191         |
| TiO <sub>2</sub>                                        | $\ln (C_t/C_0) = -0.02386 - 0.04614x$    | 0.0422               | 0.9808         |
| g-C <sub>3</sub> N <sub>4</sub> /TiO <sub>2</sub> =1: 2 | $\ln (C_t/C_0) = -0.02888 - 0.06592x$    | 0.0611               | 0.9797         |
| g-C <sub>3</sub> N <sub>4</sub> /TiO <sub>2</sub> =1: 1 | $\ln (C_t/C_0) = -0.00935 - 0.09405x$    | 0.0923               | 0.9986         |
| g-C <sub>3</sub> N <sub>4</sub> /TiO <sub>2</sub> =2: 1 | $\ln (C_t/C_0) = -0.00416 - 0.17534x$    | 0.1746               | 0.9904         |
| g-C <sub>3</sub> N <sub>4</sub> /TiO <sub>2</sub> =3: 1 | $\ln (C_t/C_0) = -0.01803 - 0.14096x$    | 0.1379               | 0.9902         |
| Direct photocatalysis                                   | $\ln (C_t/C_0) = -0.0069 - 0.00861x$     | 0.0098               | 0.8968         |

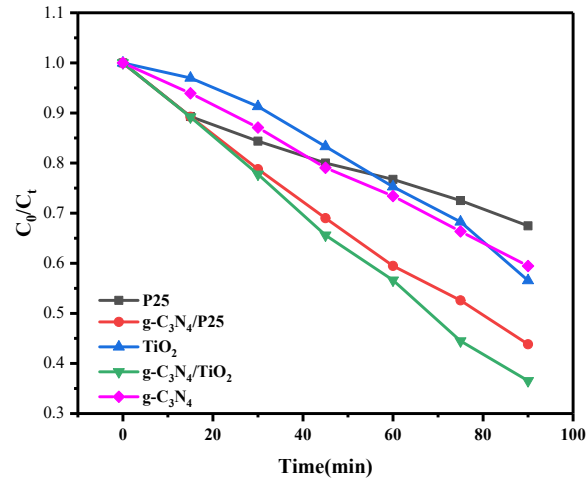

Figure S6. Photocatalytic degradation of MB by different photocatalysts under the irradiation of 300 W Xenon lamp ( $\lambda > 420$  nm).

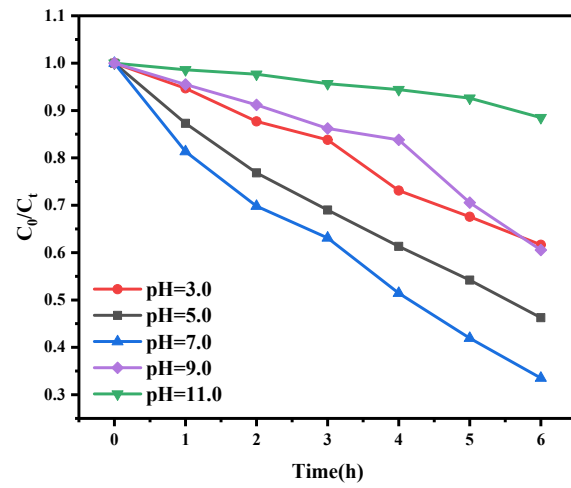

Figure S7. Effect of pH on photocatalytic activity of reaction system.

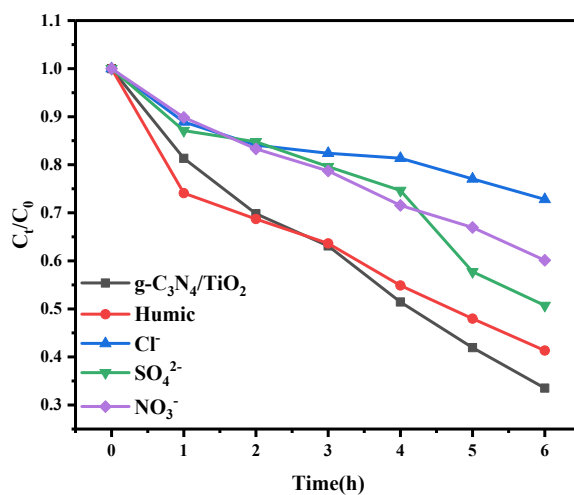

Figure S8. Effect of interfering ions on photocatalytic activity of reaction system.

Figure S9. ESR spectra of radical adducts ( $\cdot\text{O}_2^-$  (a) and  $\cdot\text{OH}$ (a))trapped by DMPO in g-C<sub>3</sub>N<sub>4</sub> and (101)-(001)-TiO<sub>2</sub> dispersion as a function of time under dark and visible light (in methanol dispersion for DMPO- $\cdot\text{O}_2^-$  and in aqueous for DMPO- $\cdot\text{OH}$ ).
